# Supplementary material for: Exploring snake occurrence records: Spatial biases and marginal gains from accessible social media
Source: PubMed Central journal article supplement (PMC6924322; doi:10.7717/peerj.8059), 2019-12-17
Supplement: peerj-07-8059-s002.pdf [file peerj-07-8059-s002.pdf]

**GBIF**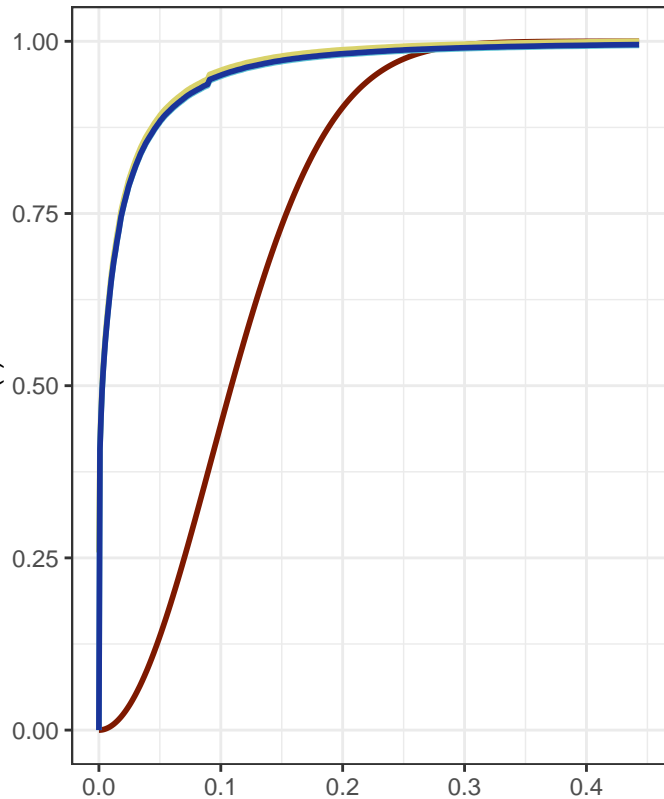**Flickr**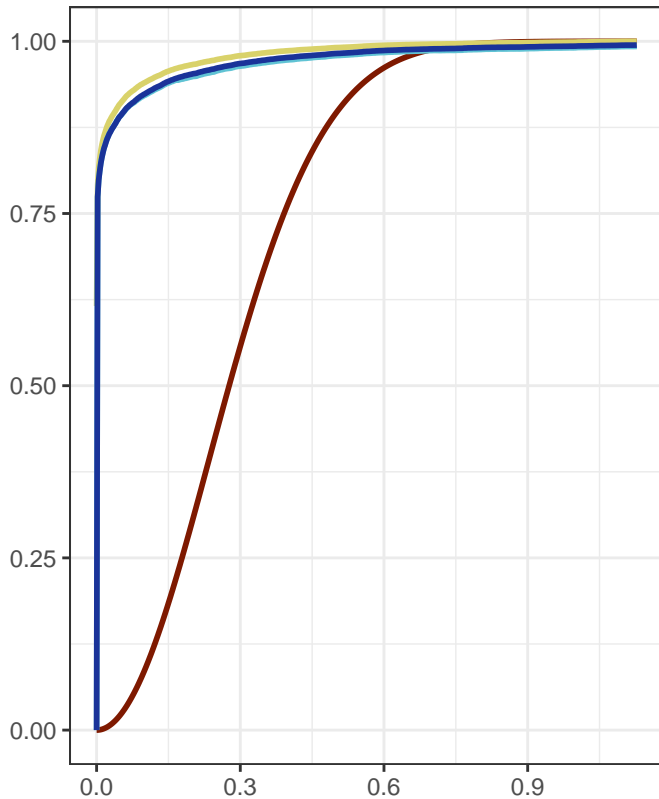

- $G_{pois}(r)$
- $G_{han}(r)$
- $G_{rs}(r)$
- $G_{km}(r)$
