# Supplementary material for: Exploring snake occurrence records: Spatial biases and marginal gains from accessible social media
Source: PubMed Central journal article supplement (PMC6924322; doi:10.7717/peerj.8059), 2019-12-17
Supplement: peerj-07-8059-s003.pdf [file peerj-07-8059-s003.pdf]

**GBIF**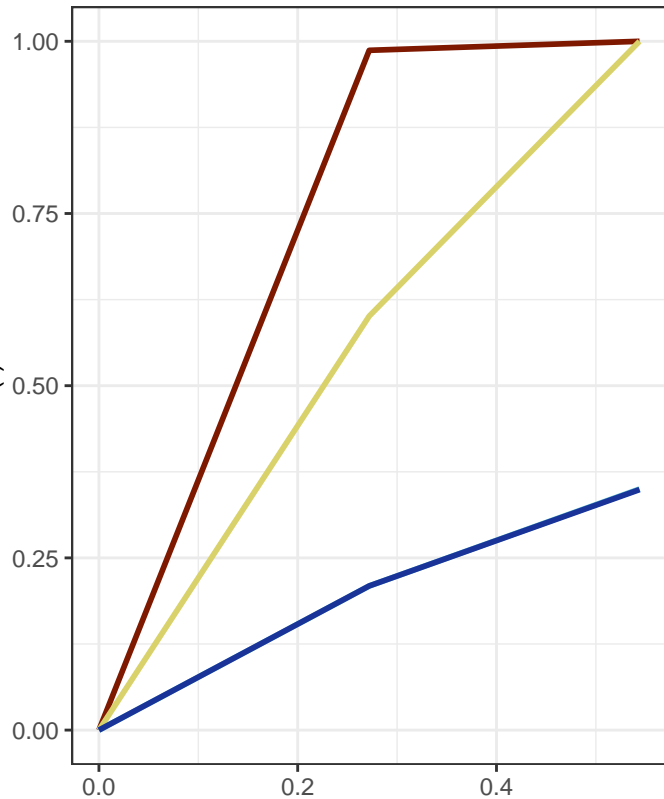**Flickr**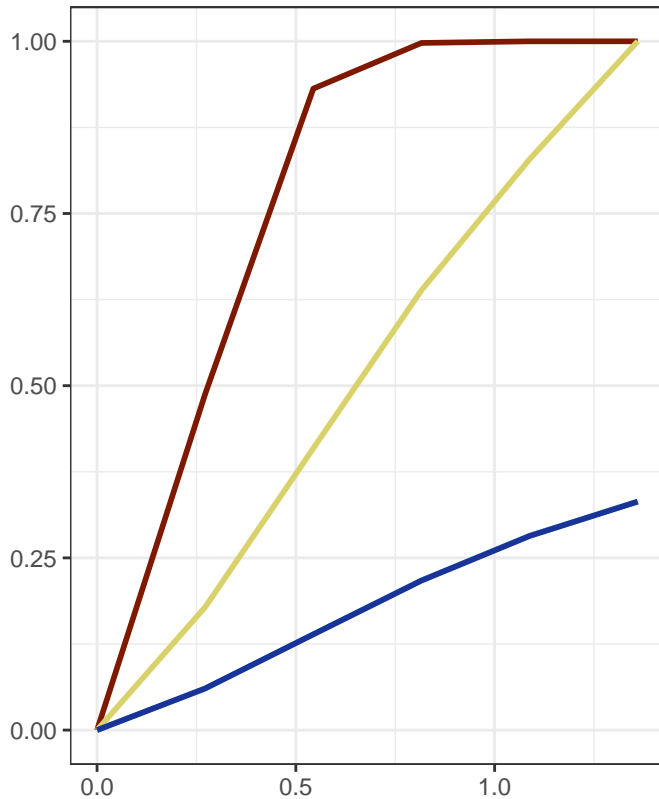

- $F_{pois}(r)$
- $F_{cs}(r)$
- $F_{bord}(r)$
- $F_{km}(r)$
