# Supplementary material for: Exploring snake occurrence records: Spatial biases and marginal gains from accessible social media
Source: PubMed Central journal article supplement (PMC6924322; doi:10.7717/peerj.8059), 2019-12-17

**GBIF**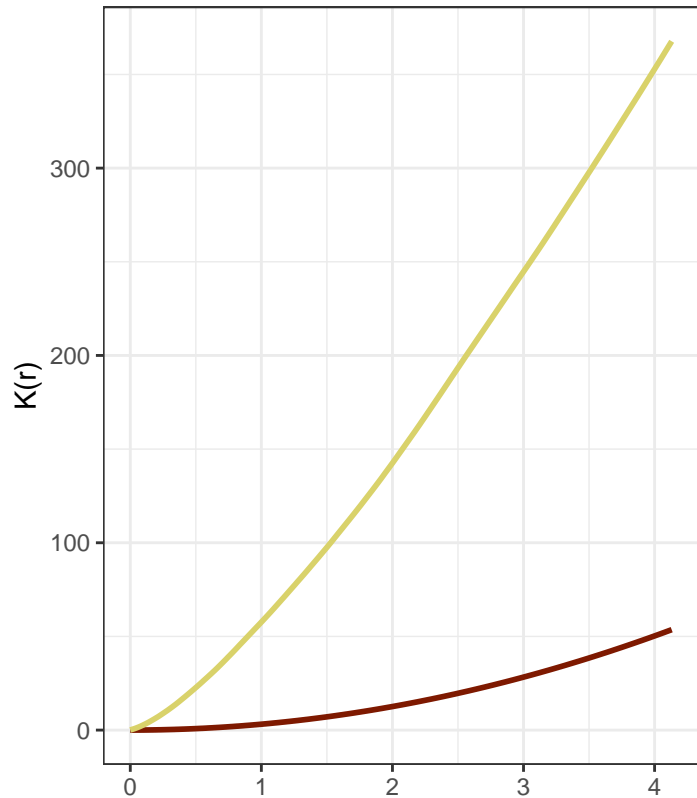**Flickr**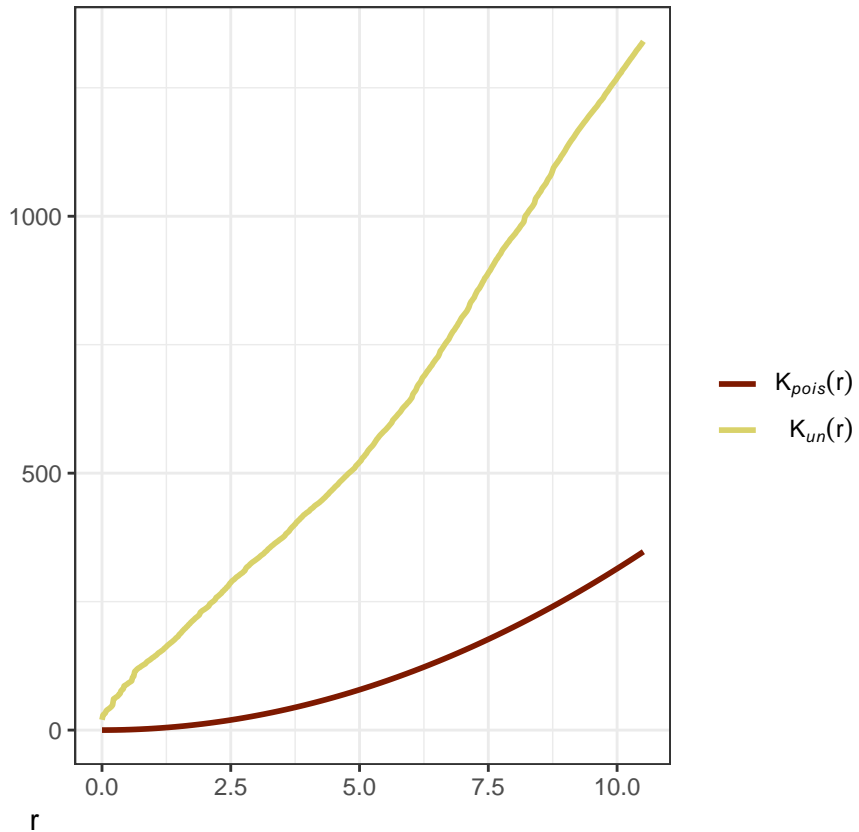

Supplement: peerj-07-8059-s004.pdf [file peerj-07-8059-s004.pdf]
